# Supplementary material for: Lassa Virus in Multimammate Rats, Côte d’Ivoire, 2013
Source: PubMed Central journal article supplement (PMC4517737; doi:10.3201/eid2108.150312), 2015-08
Supplement: 15-0312-Techapp-s1.pdf [file 15-0312-Techapp-s1.pdf]

# Lassa Virus in Multimammate Rats, Côte d'Ivoire, 2013

## Technical Appendix

### Experimental Procedures and Results

#### Sampling

Small mammals were captured during August–October 2013 in 15 villages in northern, central, and southwestern Côte d'Ivoire (Technical Appendix Figure). Animals were trapped with Sherman traps (Pet Factory, Hülse, Germany). Following methods of Fichet-Calvet et al. (1), we placed 50 traps inside houses (2 trap set in each room) and 40 traps in the cultivations and forests surrounding every village for 3 consecutive nights (1). Traps were baited daily with a mixture of peanuts, dry fish, and wheat flour.

All animals were anesthetized and euthanized with ether, according to animal welfare guidelines. A predefined set of morphologic features was recorded for each animal (sex, age category, weight, length of head and body, length of tail, and length of hind foot). At this stage, a preliminary assignment to the genus level was performed. Whole blood and tissue samples were taken in the following order: liver, spleen, lung, kidney, and intestine; intestine was sampled last to minimize risk of fecal contamination of the other organs. All samples were immediately preserved in liquid nitrogen, transported on dry ice, and stored at  $-80^{\circ}\text{C}$  upon arrival at the Robert Koch Institute (Berlin, Germany). Handling and necropsies of the animals were performed only by trained workers who applied appropriate safety measures.

#### Molecular Biology

Total nucleic acids were extracted from lung samples by using a NucleoSpin kit (Macherey-Nagel, Düren, Germany). Reverse-transcription PCR was performed by using the SuperScript II Reverse transcription kit (Invitrogen, Carlsbad, CA, USA) and random hexamer primers (Bioline, London, UK).

Five microliter complementary DNA (cDNA) samples were tested for the presence of Lassa virus genetic material by using a PCR assay targeting a ca. 400 bp fragment of the RNA polymerase (L) gene (2). PCR reactions (total volume 25  $\mu$ L) were prepared to contain 4 U Platinum *Taq* (Invitrogen), 1X PCR buffer, 1.5 mM MgCl<sub>2</sub>, 200  $\mu$ M dNTPs, 0.3  $\mu$ M forward primers (LVL3359A, LVL3359D and LVL3359G), and 0.6  $\mu$ M reverse primers (LVL3754A and LVL3754D). Cycling conditions were as follows: 95°C for 2 minutes; 45 cycles at 95°C for 20 seconds, 55°C for 45 seconds, and 72°C for 60 seconds; and final extension at 72°C for 10 minutes.

One microliter nucleic acid extract was also used to amplify a ca. 800 bp fragment of the mitochondrial cytochrome *b* gene of the host (3). PCR reactions (total volume 25 $\mu$ L) were prepared to contain 2 U Platinum *Taq* (Invitrogen), 1X PCR buffer, 4 mM MgCl<sub>2</sub>, 200  $\mu$ M dNTPs, and 0.2  $\mu$ M of each primer (L14724 and H15506). Cycling conditions were as follows: 95°C for 5 minutes; 40 cycles at 95°C for 30 seconds, 52°C for 30 seconds, and 72°C for 45 seconds; and final extension at 72°C for 10 minutes.

All PCR products were sequenced on both strands according to Sanger's method. Sequence identity was confirmed with BLAST (National Center for Biotechnology Information, Bethesda, MD, USA) (4). BLAST results were further used to assign host sequences to species in combination with genus-level morphologic identification and occurrence data derived from the International Union for Conservation of Nature Red List database (<http://www.iucnredlist.org/>; Technical Appendix Table 1).

## **Isolation of Virus from Positive Samples Not Attempted Thus Far**

### **Lassa Virus Phylogenetic Analyses**

A dataset of the sequences generated in this study, selected reference sequences derived from infected humans, and all sequences derived from multimammate rats were reduced to unique haplotypes by using ALTER (5). The haplotyped dataset comprised 53 sequences, including 46 with known dates of collection. Further analyses were performed on the full haplotyped dataset (D<sub>53</sub>), and the same dataset reduced to sequences with known dates of collection (D<sub>46</sub>). Technical Appendix Table 2 describes the sequences comprised in D<sub>53</sub> (GenBank accession numbers, host, and place and date of sample collection). We used

jModelTest v2.1.4 (6) and the Bayesian information criterion to select the model of nucleotide substitution that best fit the datasets (HKY+G). Maximum likelihood trees were inferred by using PhyML v3.0 (7), as implemented on the PhyML webserver (8). Tree search started from a BioNJ tree and used the BEST algorithm; branch robustness was assessed by nonparametric bootstrapping (250 pseudo-replicates). Bayesian analyses were performed by using BEAST v1.8.0 (9). For both datasets, analyses were performed under an uncorrelated relaxed molecular clock (lognormal) and 2 different demographic models (constant population size and SkyGrid). For any analysis, 2 Bayesian Markov chain Monte Carlo analyses were run; convergence was checked visually within and between individual runs by using Tracer v1.6 (<http://tree.bio.ed.ac.uk/software/tracer/>), and appropriate sampling of the posterior was documented (effective sample sizes >200 for all model parameters).

The relaxed clocks were calibrated as follows: for  $D_{53}$ , a strong prior was placed on the root age (normal distribution of real mean 750 years, standard deviation 130 years; 95% highest-posterior density: 500–100 years) on the basis of a published estimate of Lassa virus ancestry (10); for  $D_{46}$ , tip dates were used to inform the evolutionary rate. Both calibrations ended with very similar substitution rate estimates (Table 3). Control experiments sampling only from the prior showed that divergence dates were informed by sequences; however, these results should be considered with care as no real clock-likeness signal could be detected from the maximum likelihood tree when it was analyzed with Path-O-Gen v1.4 (<http://tree.bio.ed.ac.uk/software/pathogen/>).

The output of the Bayesian Markov chain Monte Carlo runs was combined by using LogCombiner v1.8.0 (distributed with BEAST). The resulting tree file was analyzed with RootAnnotator (11), which itself used TreeAnnotator v1.8.0 (distributed with BEAST); this analysis enabled plotting of root posterior probabilities along with other values of interest. The final tree was plotted by using FigTree v1.4 (<http://tree.bio.ed.ac.uk/software/figtree/>) and further edited with Inkscape (<https://inkscape.org/en/>).

## References

1. Fichet-Calvet E, Lecompte E, Koivogui L, Soropogui B, Dore A, Kourouma F, et al. Fluctuation of abundance and Lassa virus prevalence in *Mastomys natalensis* in Guinea, West Africa. *Vector Borne Zoonotic Dis.* 2007;7:119–28. [PubMed http://dx.doi.org/10.1089/vbz.2006.0520](http://dx.doi.org/10.1089/vbz.2006.0520)

- <jrn>2. Lecompte E, Fichet-Calvet E, Daffis S, Koulemou K, Sylla O, Kourouma F, et al. *Mastomys natalensis* and Lassa fever, West Africa. *Emerg Infect Dis*. 2006;12:1971–4. [PubMed](#)  
<http://dx.doi.org/10.3201/eid1212.060812></jrn>
- <jrn>3. O'Brien J, Mariani C, Olson L, Russell AL, Say L, Yoder AD, et al. Multiple colonisations of the western Indian Ocean by *Pteropus* fruit bats (Megachiroptera: Pteropodidae): the furthest islands were colonised first. *Mol Phylogenet Evol*. 2009;51:294–303. [PubMed](#)  
<http://dx.doi.org/10.1016/j.ympev.2009.02.010></jrn>
- <jrn>4. Altschul SF, Gish W, Miller W, Myers EW, Lipman DJ. Basic local alignment search tool. *J Mol Biol*. 1990;215:403–10. [PubMed](#) [http://dx.doi.org/10.1016/S0022-2836\(05\)80360-2](http://dx.doi.org/10.1016/S0022-2836(05)80360-2)</jrn>
- <jrn>5. Glez-Pena D, Gomez-Blanco D, Reboiro-Jato M, Fdez-Riverola F, Posada D. ALTER: program-oriented conversion of DNA and protein alignments. *Nucleic Acids Res*. 2010;38:W14–8.</jrn>
- <jrn>6. Darriba D, Taboada GL, Doallo R, Posada D. jModelTest 2: more models, new heuristics and parallel computing. *Nat Methods*. 2012;9:772. [PubMed](#)  
<http://dx.doi.org/10.1038/nmeth.2109></jrn>
- <jrn>7. Guindon S, Dufayard JF, Lefort V, Anisimova M, Hordijk W, Gascuel O. New algorithms and methods to estimate maximum-likelihood phylogenies: assessing the performance of PhyML 3.0. *Syst Biol*. 2010;59:307–21. [PubMed](#) <http://dx.doi.org/10.1093/sysbio/syq010></jrn>
- <jrn>8. Guindon S, Lethiec F, Duroux P, Gascuel O. PHYML Online—a web server for fast maximum likelihood-based phylogenetic inference. *Nucleic Acids Res*. 2005;33:W557–9. [PubMed](#)  
<http://dx.doi.org/10.1093/nar/gki352></jrn>
- <jrn>9. Drummond AJ, Suchard MA, Xie D, Rambaut A. Bayesian phylogenetics with BEAUti and the BEAST 1.7. *Mol Biol Evol*. 2012;29:1969–73. [PubMed](#)  
<http://dx.doi.org/10.1093/molbev/mss075></jrn>
- <jrn>10. Lalis A, Leblois R, Lecompte E, Denys C, Ter Meulen J, Wirth T. The impact of human conflict on the genetics of *Mastomys natalensis* and Lassa virus in West Africa. *PLoS ONE*. 2012;7:e37068. [PubMed](#) <http://dx.doi.org/10.1371/journal.pone.0037068></jrn>
- <jrn>11. Calvignac-Spencer S, Schulze JM, Zickmann F, Renard BY. Clock rooting further demonstrates that Guinea 2014 EBOV is a member of the Zaire lineage. *PLoS Curr*. 2014;6:pii. [PubMed](#)</jrn>

**Technical Appendix Table 1.** Small mammal species determination of the 248 animals that could be assigned to the species level (i.e., 88% of the sampling)

| Order                 | Species                        | Bouaké    | Korhogo   | Täi       | Total (%)  |
|-----------------------|--------------------------------|-----------|-----------|-----------|------------|
| Eulipotyphla          | <i>Crociodura buettikoferi</i> |           |           | 2         | 2 (0.8)    |
|                       | <i>Crociodura juvenetae</i>    | 1         |           |           | 1 (0.4)    |
|                       | <i>Crociodura olivieri</i>     | 9         | 4         | 1         | 14 (5.6)   |
|                       | <i>Crociodura theresae</i>     | 1         |           |           | 1 (0.4)    |
| Rodentia              | <i>Lophuromys sikapusi</i>     |           | 2         |           | 2 (0.8)    |
|                       | <i>Mastomys natalensis</i>     | 54        | 65        | 41        | 160 (64.5) |
|                       | <i>Mus mattheyi</i>            | 1         |           |           | 1 (0.4)    |
|                       | <i>Mus minutoides</i>          | 9         | 1         | 16        | 26 (10.5)  |
|                       | <i>Mus setulosus</i>           | 9         |           | 1         | 10 (4.0)   |
|                       | <i>Praomys daltoni</i>         | 1         |           |           | 1 (0.4)    |
|                       | <i>Praomys rostratus</i>       |           | 4         | 6         | 10 (4.0)   |
|                       | <i>Rattus rattus</i>           | 1         |           | 13        | 14 (5.6)   |
|                       | <i>Taterillus gracilis</i>     |           | 2         |           | 2 (0.8)    |
| <i>Uranomys ruddi</i> | 4                              |           |           | 4 (1.6)   |            |
| Total (%)             |                                | 90 (36.3) | 78 (31.5) | 80 (32.3) |            |

**Technical Appendix Table 2.** Sequences used for phylogenetic analyses of Lassa fever viruses in multimammate rats, Côte d'Ivoire, 2013

| GenBank accession no. | Host                       | Place of collection | Date of collection* |
|-----------------------|----------------------------|---------------------|---------------------|
| AY179171              | <i>Homo sapiens</i>        | Germany             | 2000                |
| AY628200              | <i>Homo sapiens</i>        | Guinea              | 1981                |
| AY628204              | <i>Homo sapiens</i>        | Liberia             | ?                   |
| AY693638              | <i>Homo sapiens</i>        | Liberia             | 1980                |
| AY870334              | <i>Homo sapiens</i>        | Liberia             | 2004                |
| GU979509              | <i>Homo sapiens</i>        | Liberia             | 2005                |
| GU979510              | <i>Homo sapiens</i>        | Liberia             | 2005                |
| GU979511              | <i>Homo sapiens</i>        | Liberia             | 2005                |
| GU979512              | <i>Homo sapiens</i>        | Liberia             | 2005                |
| AY179175S1            | <i>Homo sapiens</i>        | Nigeria             | 2000                |
| AY693637              | <i>Homo sapiens</i>        | Nigeria             | 2004                |
| AY693639              | <i>Homo sapiens</i>        | Nigeria             | 1993                |
| AY693640              | <i>Homo sapiens</i>        | Nigeria             | 1974                |
| GU481057              | <i>Homo sapiens</i>        | Nigeria             | 2005                |
| GU481062              | <i>Homo sapiens</i>        | Nigeria             | 2007                |
| GU481065              | <i>Homo sapiens</i>        | Nigeria             | 2008                |
| GU481067              | <i>Homo sapiens</i>        | Nigeria             | 2008                |
| GU481069              | <i>Homo sapiens</i>        | Nigeria             | 2008                |
| GU481071              | <i>Homo sapiens</i>        | Nigeria             | 2008                |
| GU481073              | <i>Homo sapiens</i>        | Nigeria             | 2008                |
| GU481075              | <i>Homo sapiens</i>        | Nigeria             | 2008                |
| GU481077              | <i>Homo sapiens</i>        | Nigeria             | 2008                |
| GU481079              | <i>Homo sapiens</i>        | Nigeria             | 2008                |
| AY179172              | <i>Homo sapiens</i>        | Sierra Leone        | 2000                |
| AY363905              | <i>Homo sapiens</i>        | Sierra Leone        | ?                   |
| AY363906              | <i>Homo sapiens</i>        | Sierra Leone        | ?                   |
| AY363907              | <i>Homo sapiens</i>        | Sierra Leone        | ?                   |
| AY363908              | <i>Homo sapiens</i>        | Sierra Leone        | ?                   |
| AY363909              | <i>Homo sapiens</i>        | Sierra Leone        | ?                   |
| AY363910              | <i>Homo sapiens</i>        | Sierra Leone        | ?                   |
| GU979507              | <i>Homo sapiens</i>        | Sierra Leone        | 2006                |
| U63094                | <i>Homo sapiens</i>        | Sierra Leone        | 1976                |
| LN823982              | <i>Mastomys natalensis</i> | Cote d'Ivoire       | 2013                |
| LN823983              | <i>Mastomys natalensis</i> | Cote d'Ivoire       | 2013                |
| LN823984              | <i>Mastomys natalensis</i> | Cote d'Ivoire       | 2013                |
| LN823985              | <i>Mastomys natalensis</i> | Cote d'Ivoire       | 2013                |
| GU979513              | <i>Mastomys natalensis</i> | Guinea              | 2003                |
| GU573541              | <i>Mastomys natalensis</i> | Mali                | 2009                |
| GU573545              | <i>Mastomys natalensis</i> | Mali                | 2009                |
| GU573546              | <i>Mastomys natalensis</i> | Mali                | 2009                |
| KF478760              | <i>Mastomys natalensis</i> | Mali                | 2012                |
| KF478761              | <i>Mastomys natalensis</i> | Mali                | 2012                |
| KF478763              | <i>Mastomys natalensis</i> | Mali                | 2012                |
| KF478764              | <i>Mastomys natalensis</i> | Mali                | 2012                |
| KM822110              | <i>Mastomys natalensis</i> | Sierra Leone        | 2010                |

| GenBank accession no. | Host                       | Place of collection | Date of collection* |
|-----------------------|----------------------------|---------------------|---------------------|
| KM822112              | <i>Mastomys natalensis</i> | Sierra Leone        | 2010                |
| KM822114              | <i>Mastomys natalensis</i> | Sierra Leone        | 2009                |
| KM822116              | <i>Mastomys natalensis</i> | Sierra Leone        | 2012                |
| KM822119              | <i>Mastomys natalensis</i> | Sierra Leone        | 2012                |
| KM822121              | <i>Mastomys natalensis</i> | Sierra Leone        | 2012                |
| KM822123              | <i>Mastomys natalensis</i> | Sierra Leone        | 2012                |
| KM822125              | <i>Mastomys natalensis</i> | Sierra Leone        | 2012                |
| KM822129              | <i>Mastomys natalensis</i> | Sierra Leone        | 2011                |

\*?, no precise date of collection provided in the original publication.

**Technical Appendix Table 3.** Substitution rate, divergence dates, and root position across models used in a study of Lassa fever viruses in multimammate rats, Côte d'Ivoire, 2013\*

| Calibration | Demography    | Median rate [95% HPD](subst.site <sup>-1</sup> .year <sup>-1</sup> ) | Divergence date [95% HPD] |              | Root posterior probability (MCC tree root/Nigeria vs. rest) |
|-------------|---------------|----------------------------------------------------------------------|---------------------------|--------------|-------------------------------------------------------------|
|             |               |                                                                      | Human CI + rat CI         | Mali CI      |                                                             |
| Root        | Constant size | 7.6 <sup>-4</sup> [3.9 <sup>-4</sup> -1.3 <sup>-3</sup> ]            | 56 [18–104]               | 89 [32–162]  | 0.887/0.074                                                 |
|             | Skygrid       | 6.7 <sup>-4</sup> [3.3 <sup>-4</sup> -1.2 <sup>-3</sup> ]            | 64 [25–122]               | 102 [38–185] | 0.890/0.074                                                 |
| Tips        | Constant size | 8.1 <sup>-4</sup> [5.1 <sup>-4</sup> -1.1 <sup>-3</sup> ]            | 60 [36–92]                | 87 [53–132]  | 0.943/0.041                                                 |
|             | Skygrid       | 7.9 <sup>-4</sup> [4.9 <sup>-4</sup> -1.1 <sup>-3</sup> ]            | 63 [37–98]                | 90 [54–138]  | 0.929/0.047                                                 |

\*CI, Côte d'Ivoire; HPD, highest posterior density; MCC, maximum clade credibility.

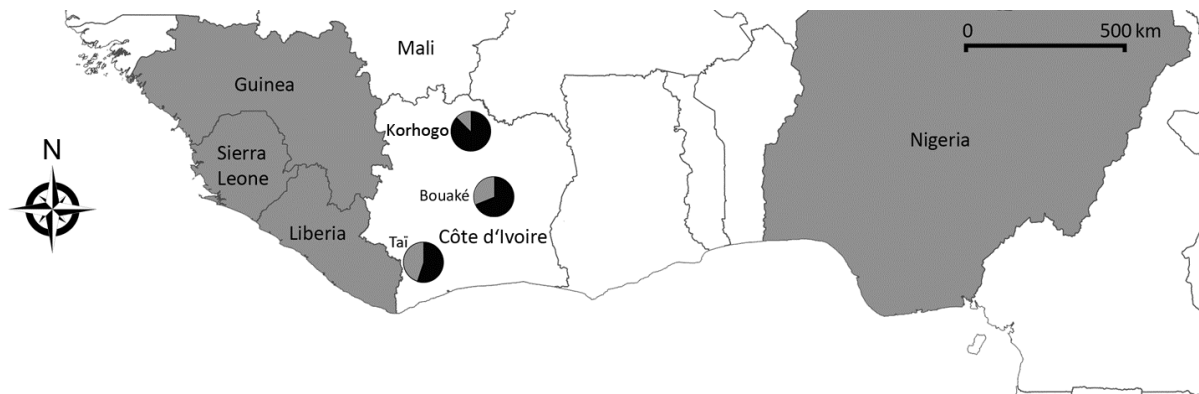

**Technical Appendix Figure.** Map of West Africa showing regions endemic for Lassa fever (LASV) and sampling sites for study of LASV in multimammate rats, Côte d'Ivoire, 2013. Pie charts in map represent sampling sites in Côte d'Ivoire (Global Positioning System coordinates: 30 P 211825 1045219, Korhogo; 30 N 276206 849368, Bouaké; 29 N 670895 649275, T'ai). Within the charts, samples from *Mastomys* sp. rats are indicated in black; those from other rodents are in gray. On the map, countries in which LASV is endemic are shaded in gray.
